# Supplementary material for: DNA-mediated assembly of a gold-nanoparticle film with controllable sonic behavior detected by novel electric-induced ultrasound
Source: Royal Society of Chemistry journal article supplement (doi:10.1039/d2bm00778a), 2022-01-01
Supplement: d2bm00778a1.pdf [file d2bm00778a1.pdf]

## Supporting Information

# DNA-mediated assembly of gold-nanoparticle film with controllable sonic behaviors detected by novel electric-induced ultrasound

Peng Wang<sup>1,2‡</sup>, Jie Zhang<sup>2,3‡</sup>, Yunhao Lu<sup>2</sup>, Zhaobin Guo<sup>4</sup>, Qing Jiang<sup>1</sup>, and Jianfei Sun<sup>2\*</sup>

1. State Key Laboratory of Pharmaceutical Biotechnology, Department of Sports Medicine and Adult Reconstructive Surgery, Nanjing Drum Tower Hospital, The Affiliated Hospital of Nanjing University Medical School, Zhongshan Road 321, Nanjing, 210008, P. R. China.
2. Jiangsu Key Laboratory for Biomaterials and Devices, State Key of Laboratory Bioelectronics, School of Biological Sciences & Medical Engineering, Southeast University, Nanjing 210096, China.
3. Wuhan MGI Tech Co., Ltd, Wu han, 430075, P. R. China
4. Future Industries Institute, University of South Australia, Mawson Lakes, SA, Australia

‡ Peng Wang and Jie Zhang contributed equally to this work.

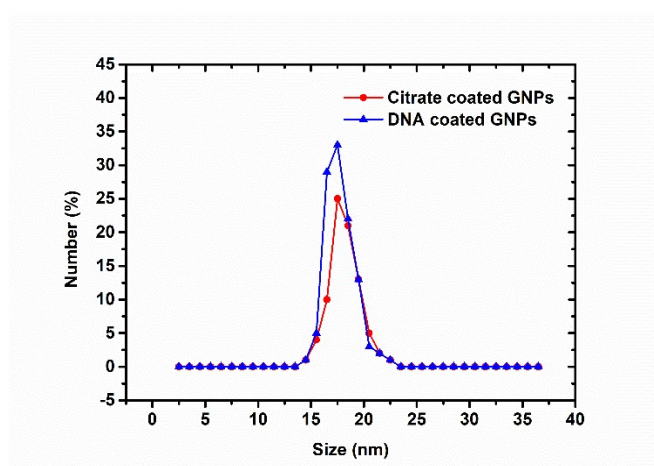

**Figure S1** Size distribution of citrate coated gold nanoparticles and DNA coated gold nanoparticles in **Figure 1a,b**.

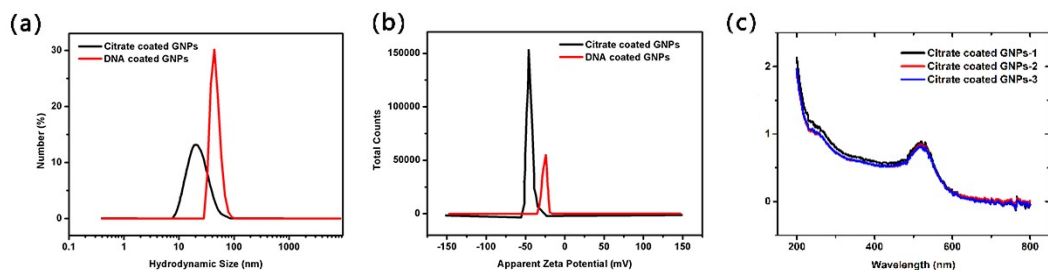

**Figure S2** Characterization of as-prepared citrate coated GNPs alone, or further modified with HS-DNA. (a) DLS and (b) Zeta potential measurement of synthesized citrate coated GNPs alone, or further modified with HS-DNA. (c) UV-Vis spectra of synthesized GNPs in 3 batches.

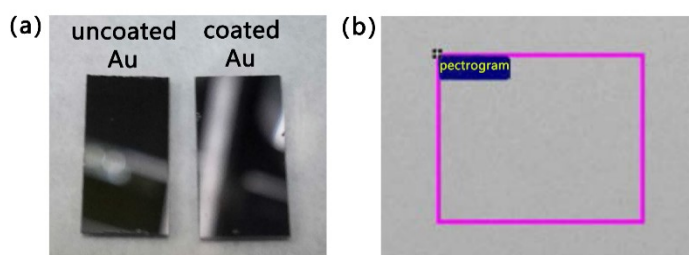

**Figure S3** (a) Photographs of the substrate with Au uncoated and coated respectively, (b) SEM images of the Au coated substrate, purple box is the selected area for EDX.

**Table S1** Elemental analysis of Au uncoated substrate for DNA coupling

| Element | Percentage by weight (%) | Percentage by atomic (%) |
|---------|--------------------------|--------------------------|
| C       | 3.66                     | 8.45                     |
| Si      | 92.13                    | 90.96                    |
| Au      | 4.21                     | 0.59                     |

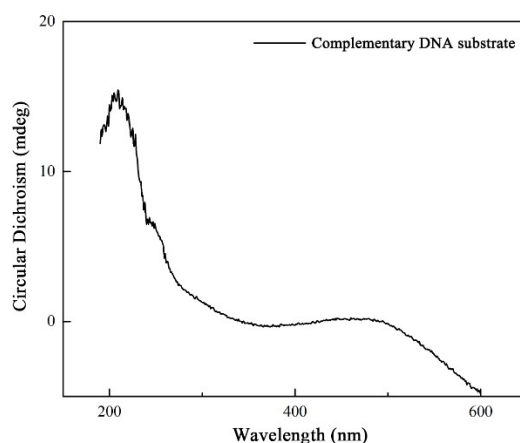

**Figure S4** Circular dichroism spectrum of complementary DNA substrate

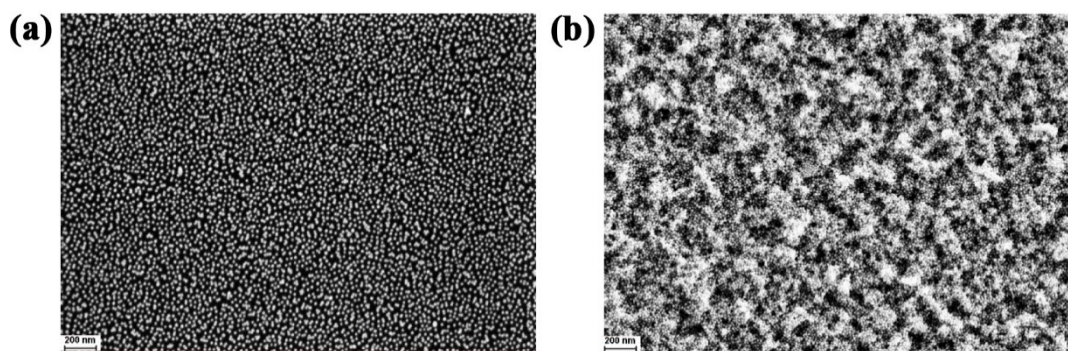

**Figure S5** SEM images of 3 and 8 layers of gold nanoparticles film using PDDA as polymeric partner for LBL assembly.

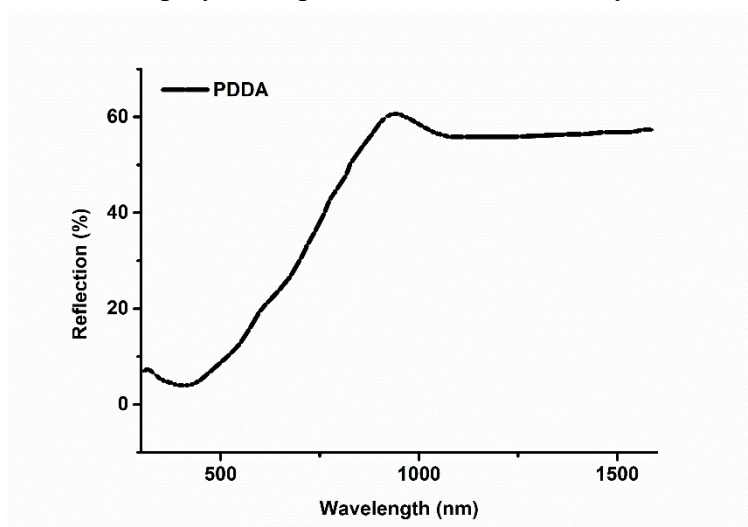

**Figure S6** Specular reflection spectrum of assembled films with PDDA.

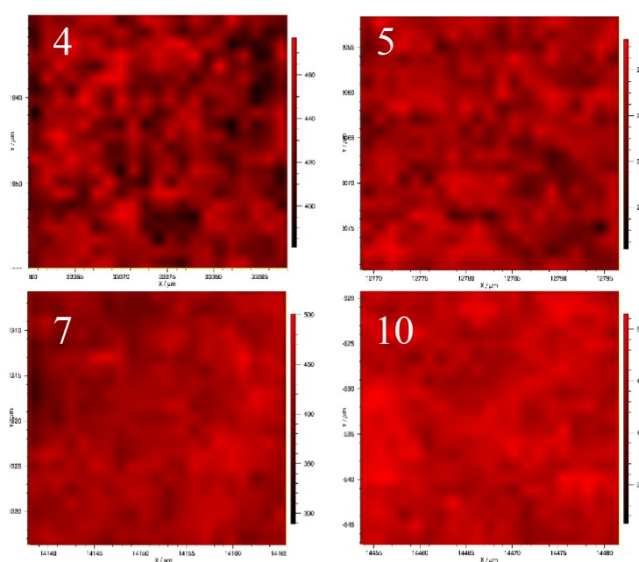

**Figure S7** Raman mapping measurements of assembled films by PDDA with 4, 5, 7, 10 layers, respectively.

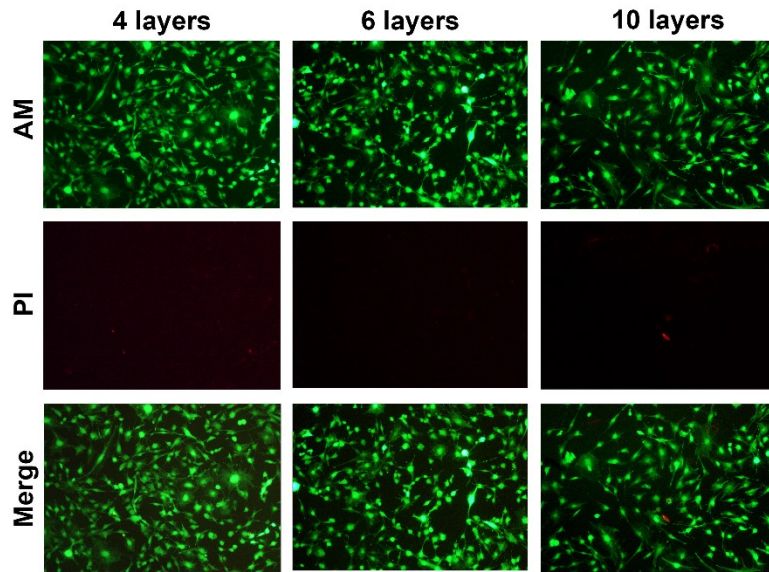

**Figure S8** Representative scan of live/dead staining of MC3E3-T1 cells seeded with DNA-mediated assembled films with 4, 6 and 10 layers, green and red labeled cells represent living and dead cells, respectively.

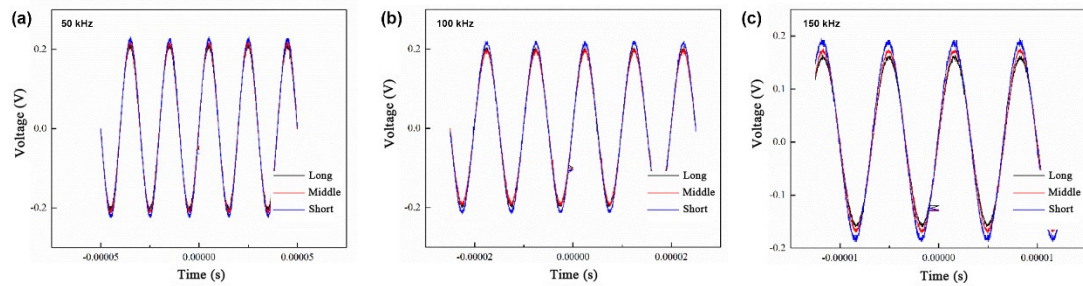

**Figure S9** Detected signal by hydrophone through the assembly of films with three different lengths at 50 kHz, 100 kHz and 150 kHz respectively.

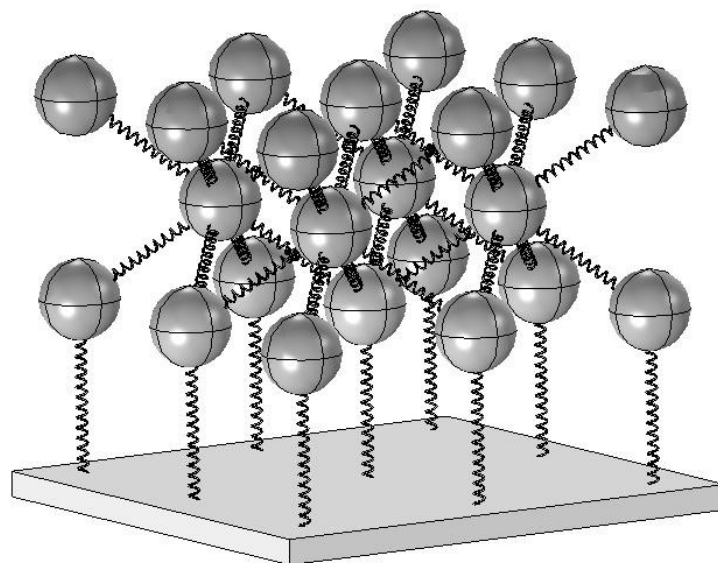

**Figure S10** Schematic diagram of mimic DNA film consisting of springs and gold balls.
